# Supplementary material
Source: PubMed Central journal article supplement (PMC4191052)
Supplement: JCI72279sd.pdf [file JCI72279sd.pdf]

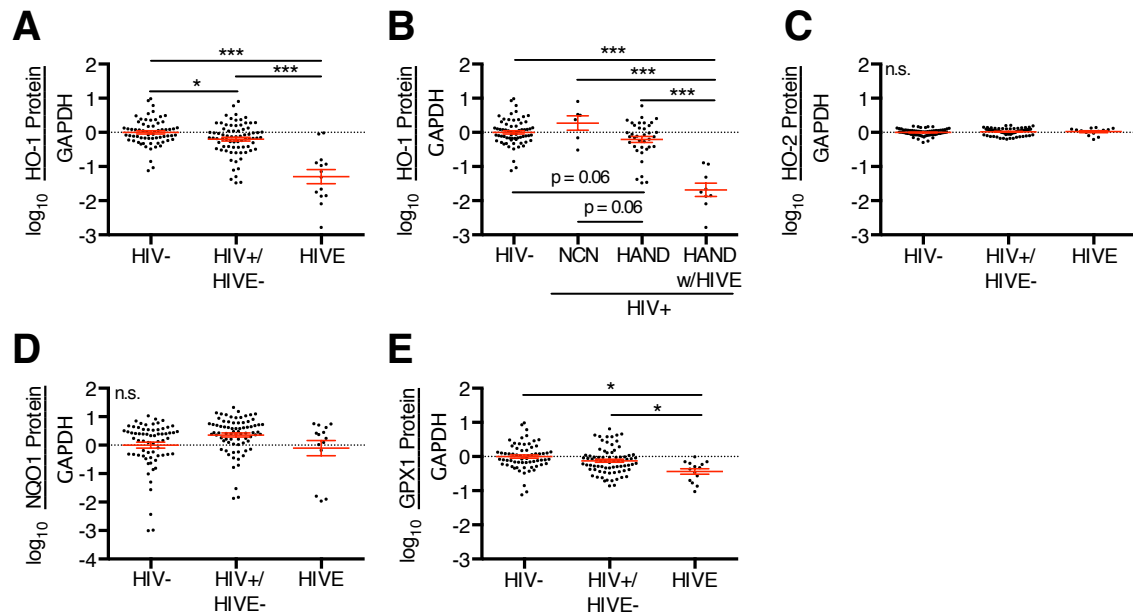

**Supplemental Figure 1:** HO-1 is deficient in the DLPFC of HIV-infected subjects. ARE protein expression was assessed by Western blot in 66 HIV-negative (HIV<sup>-</sup>), 76 HIV-positive without HIVE (HIV<sup>+</sup>/HIVE<sup>-</sup>), and 14 HIV-positive with HIVE (HIVE<sup>+</sup>) post-mortem DLPFC tissue samples. Of the 76 HIV<sup>+</sup>/HIVE<sup>-</sup> subjects, 6 were confirmed to be neurocognitively normal (NCN) and 37 were diagnosed with HAND. (A) Representative Western blot of ARE proteins in the DLPFC of HIV<sup>-</sup>, HIV<sup>+</sup>/HIVE<sup>-</sup>, and HIVE<sup>+</sup> subjects. Protein expression levels were quantified by densitometry analysis, normalized to GAPDH, and log transformed for comparison between groups for (B-C) HO-1, (D) NQO1, and (E) GPX1. The mean HIV<sup>-</sup> group protein expression was set to 0 (dotted line). Red lines indicate mean  $\pm$  SEM. Groups were analyzed by ANOVA with post hoc Holm-Sidak test. \* $p < 0.05$ , \*\* $p < 0.01$ , \*\*\* $p < 0.001$ .

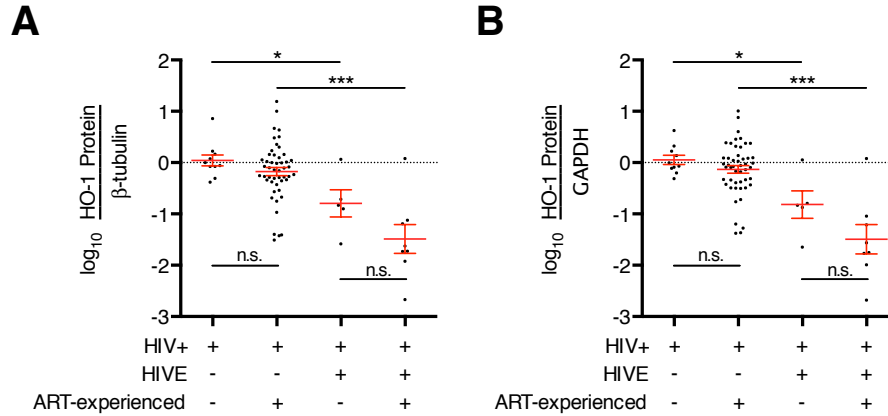

**Supplemental Figure 2:** ART exposure is not associated with DLPFC HO-1 deficiency in HIV<sup>+</sup> subjects with or without HIV. HO-1 protein expression was assessed by Western blot and densitometry signal was normalized to **(A)**  $\beta$ -tubulin and **(B)** GAPDH in 10 ART-naive HIV<sup>+</sup> subjects without HIV, 49 ART-experienced HIV<sup>+</sup> subjects without HIV, 5 ART-naive subjects with HIV, and 8 ART-experienced subjects with HIV. No significant difference was observed in DLPFC HO-1 expression in ART-naive or ART experienced subjects in HIV<sup>+</sup> subjects with or without HIV. DLPFC HO-1 expression was significantly reduced in HIV subjects compared with HIV<sup>+</sup> subjects without HIV in both the ART-naive and ART-experienced groups. The mean HIV- protein expression was set to 0 (dotted line). Red lines indicate mean  $\pm$  SEM. Groups were analyzed by ANOVA with post hoc Holm-Sidak test. \* $p < 0.05$ , \*\*\* $p < 0.001$ .

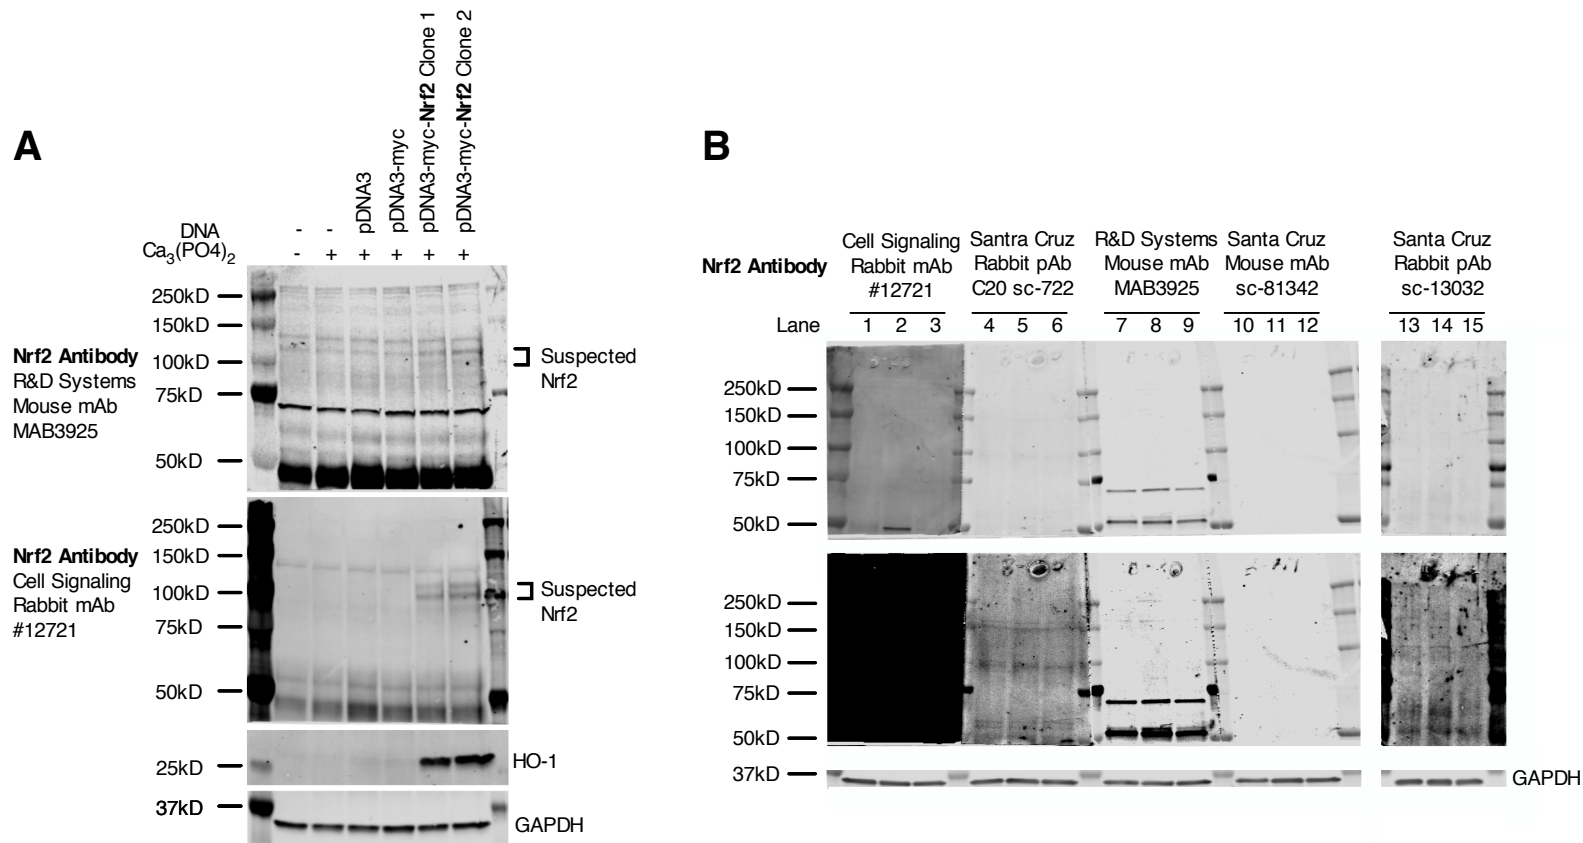

**Supplemental Figure 3:** Detection of Nrf2 protein by Western blot in Nrf2-overexpressing HEK cells and human DLPFC tissue. **A)** Empty pDNA3 vector, pDNA3-myc, or pDNA3-myc-Nrf2 were transfected into HEK cells by calcium phosphate transfection for 16 hours. Control HEK cells were left untreated or exposed to calcium phosphate transfection reagent without DNA. 48 hours after transfection cell lysates were collected and probed by Western blot for Nrf2 (mouse R&D systems 3925; rabbit Cell Signaling 12721), HO-1, and GAPDH. **B)** Prefrontal cortex protein lysates from 3 different HIV negative subjects were probed by Western blot with 5 commercially available antibodies directed against Nrf2 followed by probing with fluorescent secondary antibodies. Odyssey (LiCor) scanned Western blots show Nrf2 antibody immunoreactivity at a non-maximized (top blot) and maximized (middle blot) adjustment of the depiction of the fluorescence signal intensity using ImageStudio (LiCor). Bottom blots depict GAPDH immunoreactivity.

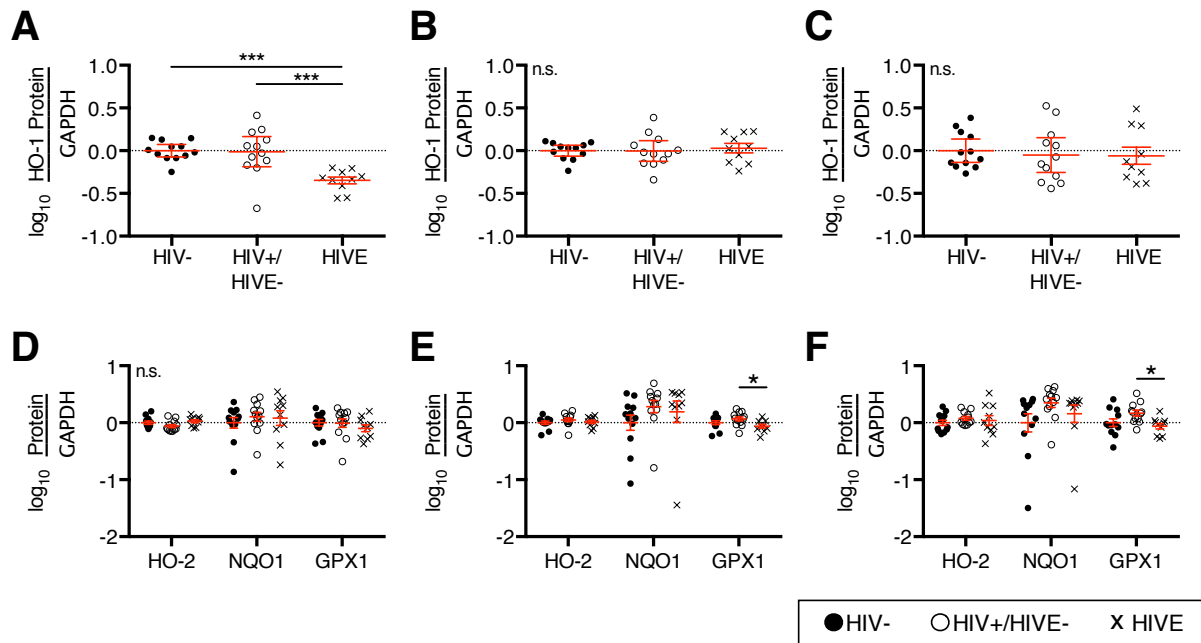

**Supplemental Figure 4:** HO-1 is deficient in the striatum of HIV-infected subjects with HIVE. HO-1 protein expression as determined by Western blot in the **A**) striatum (head of caudate), **B**) occipital cortex, and **C**) anterior cerebellum of 12 HIV<sup>-</sup>, 12 HIV<sup>+</sup>/HIVE<sup>-</sup>, and 12 HIVE subjects. In the same cohort HO-2, NQO1, and GPX1 protein expression was determined by Western blot in the **D**) striatum, **E**) occipital cortex, and **F**) cerebellum. Protein expression levels were quantified by densitometry analysis, normalized to GAPDH, and log transformed for comparison between groups. The mean HIV- group protein expression was set to 0 (dotted line). Red lines indicate mean  $\pm$  SEM. Groups were analyzed by ANOVA with post hoc Holm-Sidak test. \* $p < 0.05$ , \*\*\* $p < 0.001$

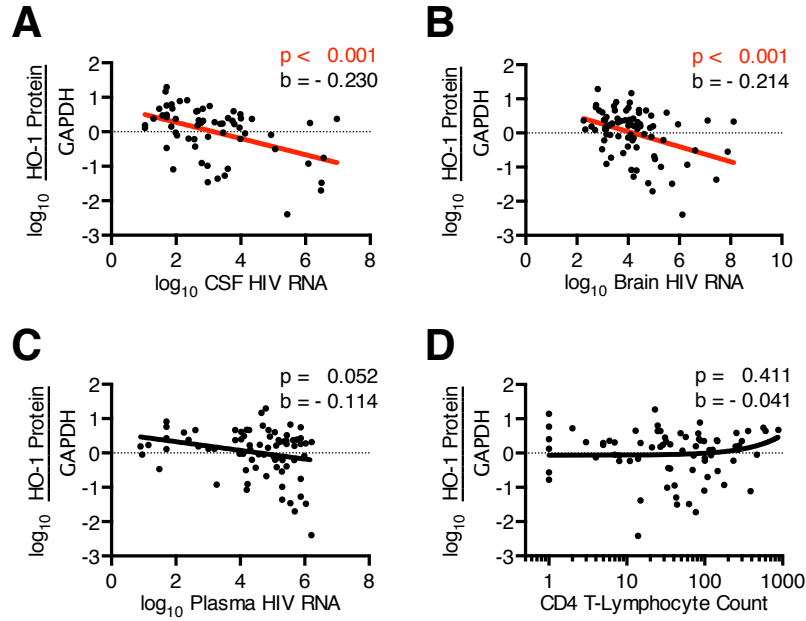

**Supplemental Figure 5:** DLPFC HO-1 protein expression correlates with CSF and brain HIV RNA levels. Samples were derived from the HIV<sup>+</sup> cohort for all subjects with detectable viral loads. Correlations were determined between DLPFC HO-1 protein expression in the DLPFC of HIV<sup>+</sup> subjects, as determined by Western blot and densitometry analysis normalized to GAPDH, and HIV RNA in (A) CSF, (B) brain parenchyma, and (C) plasma, and (D) plasma CD4 T-lymphocyte count in HIV<sup>+</sup> subjects. Associations were determined by multivariate linear regression with  $\alpha = 0.01$ . Red regression lines denote significant trends.

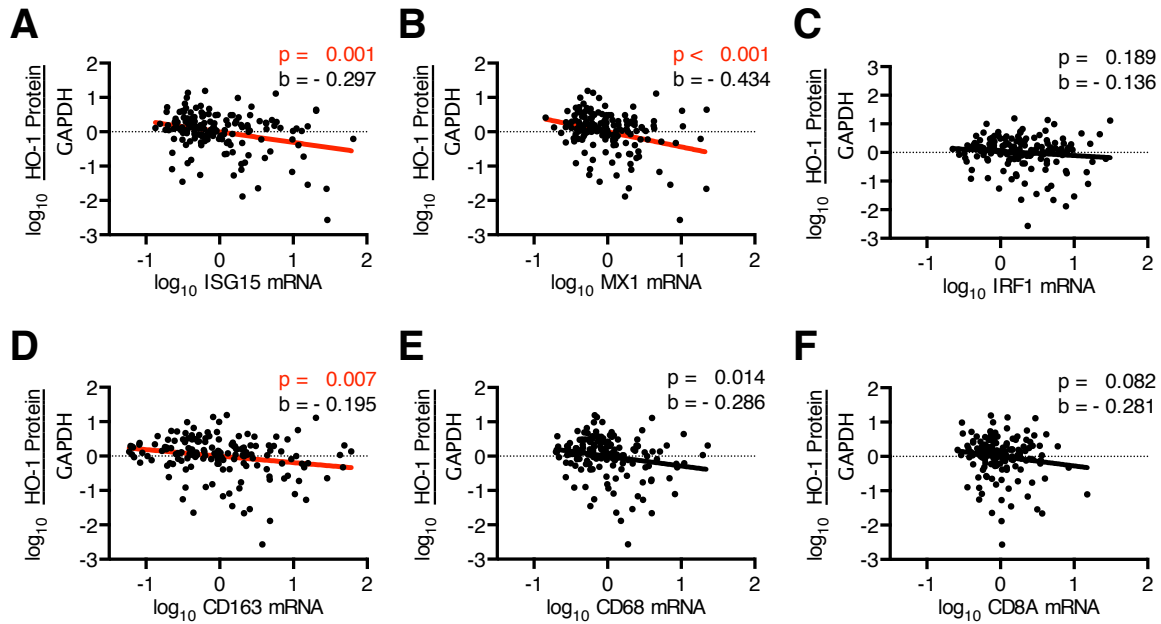

**Supplemental Figure 6:** DLPFC HO-1 protein expression correlates with brain innate immune responses and macrophage markers. Expression of mRNA was determined by RT-PCR with relative quantification to GAPDH. Correlations were determined between DLPFC HO-1 protein expression, as determined by Western blot and densitometry analysis normalized to GAPDH, and (A) *ISG15*, (B) *MX1*, (C) *IRF1*, (D) *CD163*, (E) *CD68*, and (F) *CD8A* mRNA. Associations were determined by multivariate linear regression with  $\alpha = 0.01$ . Red regression lines denote significant trends.

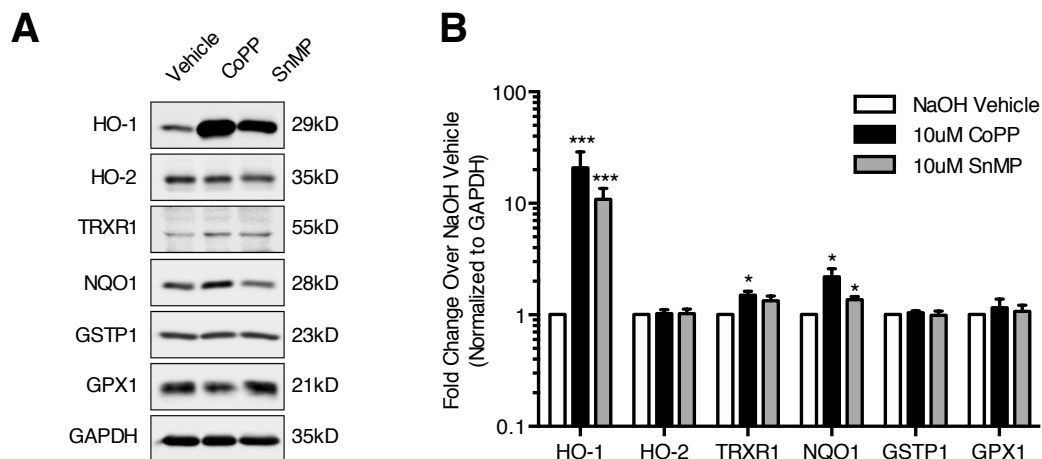

**Supplemental Figure 7:** CoPP and SnMP induce HO-1, but not HO-2, protein expression in MDM. Uninfected MDM were exposed to 10 $\mu$ M CoPP or SnMP for 24 hours and assessed for protein expression by Western blot. **(A)** Representative Western blot of HO-1, HO-2, TRXR1, NQO1, GSTP1, and GPX1 expression. **(B)** Quantification of Western blot expression by densitometry analysis. Data points represent mean  $\pm$  SEM from 6 different MDM donors. Statistical comparisons were made by one-way ANOVA plus Hold-Sidak post hoc test. \* $p < 0.05$ , \*\*\* $p < 0.001$ .

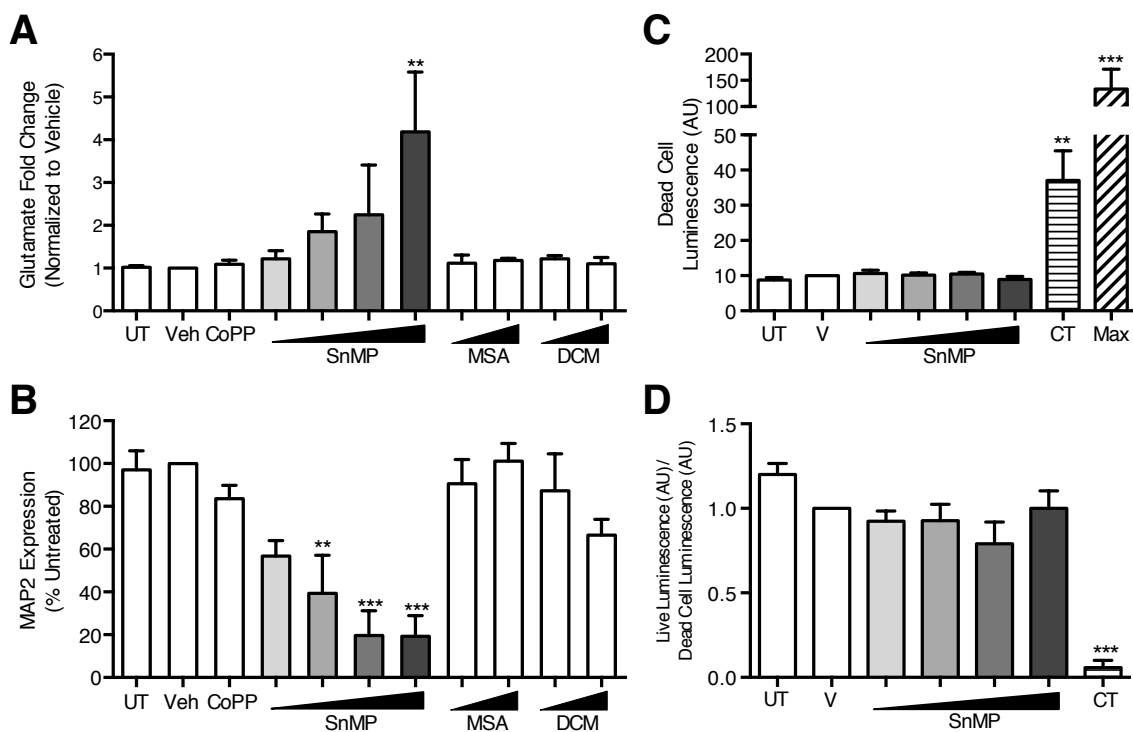

**Supplemental Figure 8:** Exposure of non-infected MDM to an inhibitor of HO-1 and HO-2 enzymatic activity (SnMP) enhances supernatant glutamate and neurotoxicity. Uninfected MDM from 4 different donors were exposed (6 days) to Vehicle (Veh), the HO-1 inhibitor SnMP (1, 5, 10, 20 μM), the HO-1 expression inducer CoPP (10 μM), the GPX1 inhibitor MSA (100 and 1000 μM), the NQO1 inhibitor DCM (1 and 10 μM), or left untreated (UT) and culture supernatants were assayed for **(A)** glutamate concentration and **(B)** neurotoxicity normalized to Vehicle. SnMP induced toxicity was quantified by **(C)** total dead cell luminescence and **(D)** the live/dead cell ratio in MDM cultures from 3 different donors. Camptothecin (CT; 6 hour exposure) and complete cell lysis (maximum cytotoxicity, Max) served as a positive controls. Values represent mean ± SEM. Statistical comparisons were made by one-way ANOVA plus Hold-Sidak post hoc test. \*\*p < 0.01, \*\*\*p < 0.001.

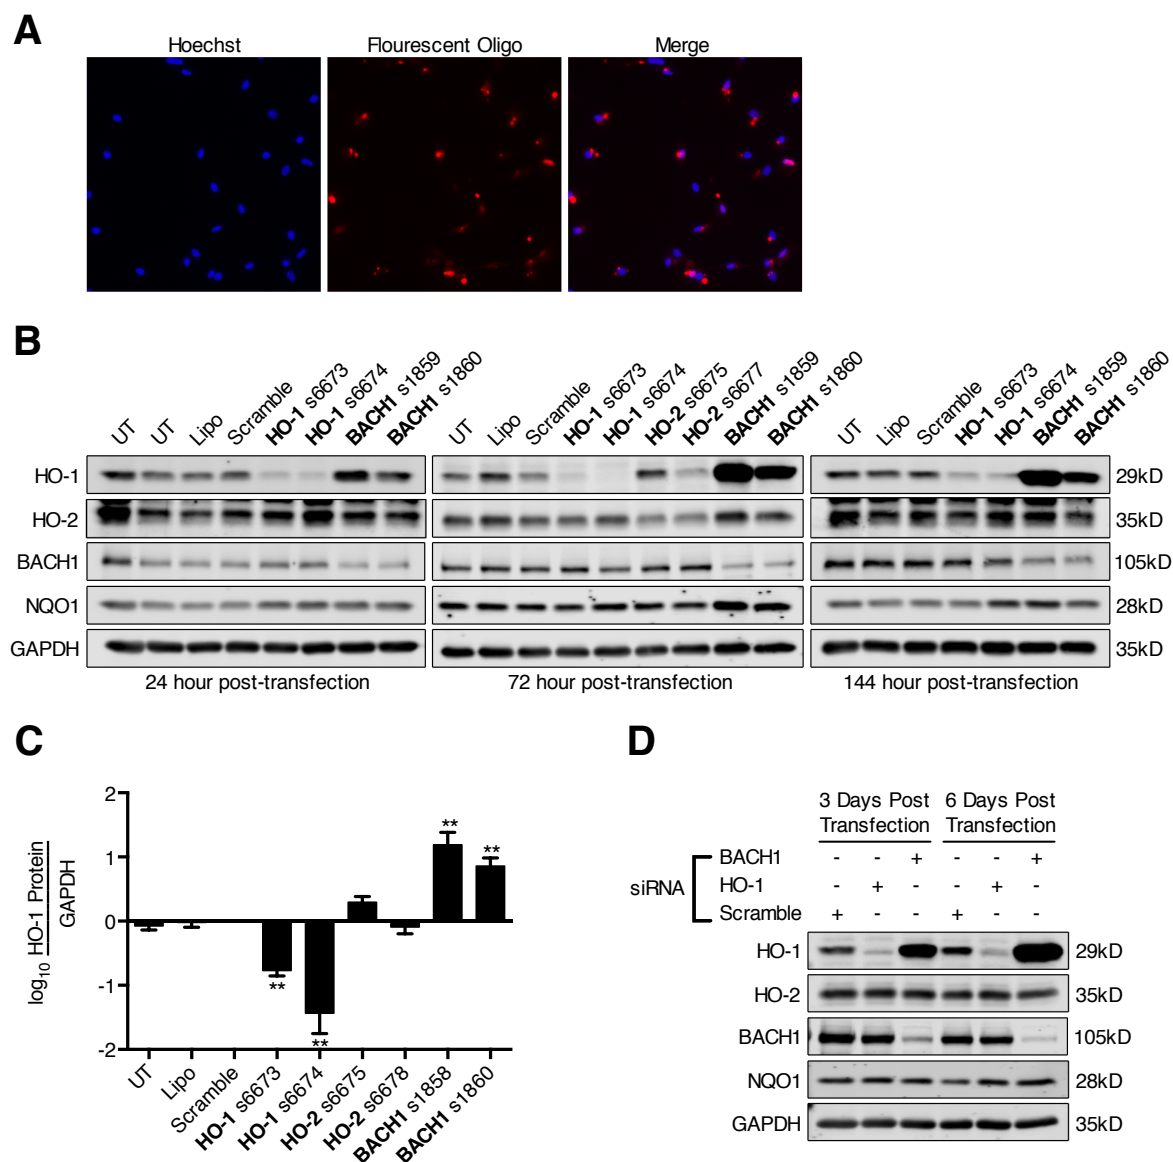

**Supplemental Figure 9:** HO-1 and BACH1 siRNAs effectively knockdown and induce HO-1 expression, respectively, in uninfected and infected MDM. 50nM of each siRNA was transfected into MDM using Lipofectamine RNAiMax. **(A)** Representative fluorescent microscopy images of MDM 24 hours post-transfection with fluorescent oligos (BLOCK-IT™ Alexa Fluor® Red Fluorescent Oligo). **(B)** Representative Western blot for HO-1, HO-2, BACH1, NQO1, and GAPDH at 24 hours, 72 hours, and 144 hours post-transfection with siRNA targeting either HO-1, HO-2, or BACH1. **(C)** Densitometry analysis of HO-1 Western blot protein expression 72 hours post siRNA transfection. Values represent log mean  $\pm$  SEM of HO-1 expression normalized to GAPDH (Vehicle

set to 0) from 4 different MDM donors. **(D)** Representative Western blot of HIV-infected MDM 3 days and 6 days post siRNA transfection. HIV-MDM were transfected with selected siRNA targeting HO-1 or BACH1 on day 6 post HIV infection. Protein lysates were either collected on day 9 post-infection (day 3 post transfection) or media was fully exchanged and protein lysates were collected on day 12 post-infection. Statistical comparisons were made by one-way ANOVA plus Hold-Sidak post hoc test. \*\* $p < 0.01$ .

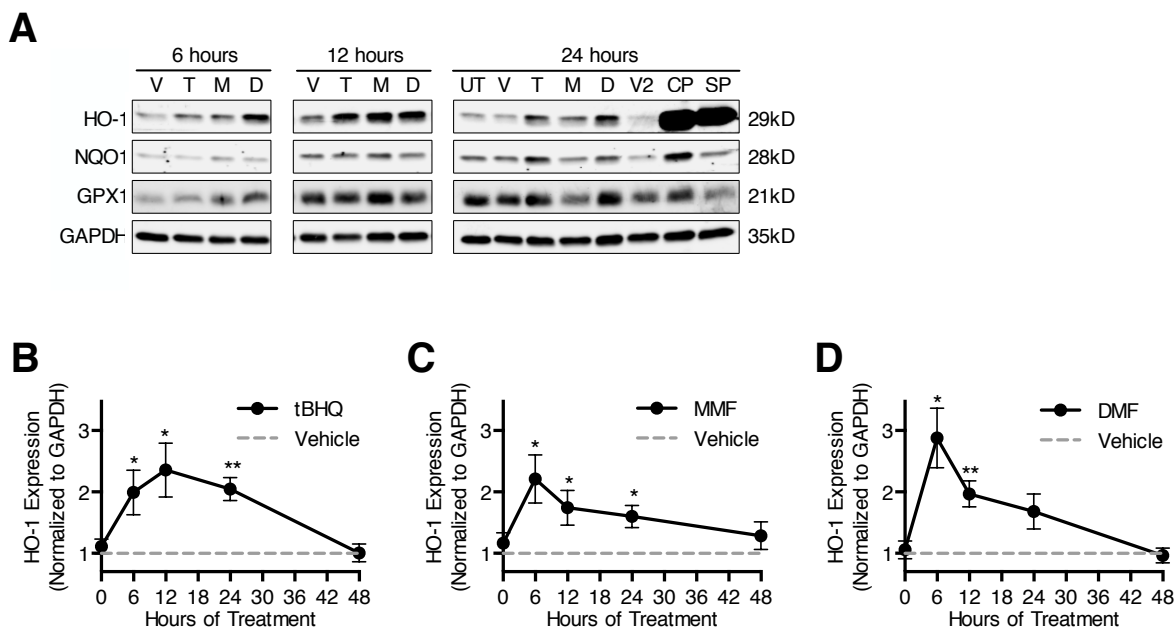

**Supplemental Figure 10:** Time course of HO-1 induction in MDM by tBHQ, MMF, and DMF. Uninfected MDM were exposed to tBHQ (T, 10 $\mu$ M), MMF (M, 30 $\mu$ M), or DMF (D, 30 $\mu$ M) for 0, 6, 12, 24, and 48 hours and assessed for HO-1 expression by Western blot (V = vehicle for tBHQ, MMF, and DMF). For comparison, MDM were also treated with CoPP (CP, 10 $\mu$ M) and SnMP (SP, 10 $\mu$ M) for 24 hours (V2 = vehicle for SnMP and CoPP). **(A)** Representative Western blot of HO-1, NQO1, and GPX expression. Quantification of HO-1 Western blot expression by densitometry analysis normalized to GAPDH for **(B)** tBHQ, **(C)** MMF, and **(D)** DMF treatment. Data points represent mean  $\pm$  SEM from 6 different MDM donors. Statistical comparisons were made by Student's paired t-test. \* $p < 0.05$ , \*\* $p < 0.01$ .

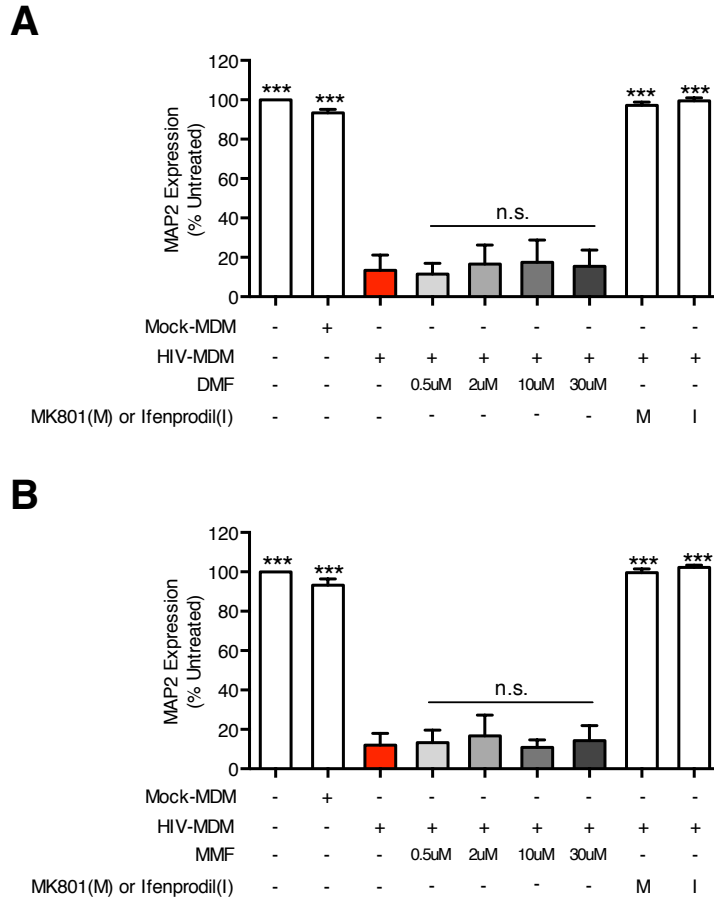

**Supplemental Figure 11:** Concurrent treatment with DMF and MMF does not protect neurons in neuroglial cultures from HIV-MDM mediated neurotoxicity. Day 14 in vitro primary rat cerebrocortical neuroglial cultures were exposed to Mock-MDM or HIV-MDM supernatant from day 12 post infection at a 1:20 dilution. HIV-MDM exposed neuroglial cultures were co-treated with increasing doses of **A)** DMF and **B)** MMF. Positive control neuroglial cultures were pre-treated (5 minutes) with either MK801 (a nonselective noncompetitive antagonist of the NMDA receptor) or Ifenprodil (a selective noncompetitive antagonist of NR2B subunit-containing NMDA receptors). 24 hours after exposure neuroglial cultures were assessed for MAP2 expression by MAP2 ELISA. MAP2 expression was normalized to untreated neuroglial cultures. Values represent the mean  $\pm$  SEM from 3 experiments using supernatant from HIV-MDM infections from 3 independent donors. Statistical analysis comparing vehicle treated neuroglial cultures to all other groups were made by one-way ANOVA plus Hold-Sidak post hoc test. \*\*\* $p < 0.001$ .

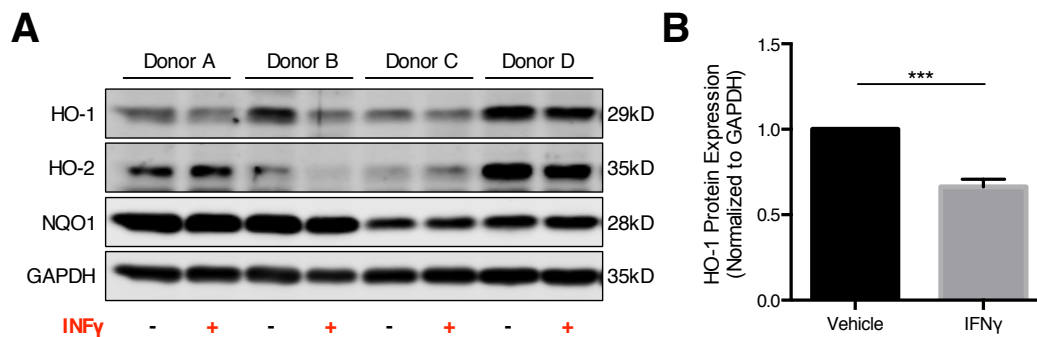

**Supplemental Figure 12:** IFN $\gamma$  reduces HO-1 protein expression in primary human MDM. MDM were treated with IFN $\gamma$  (10ng/ml) or Vehicle for 24 hours followed by cell lysis. **(A)** Western blot and **(B)** densitometry quantification of HO-1 expression normalized to GAPDH in MDM following 24 hours of exposure to IFN $\gamma$  (10ng/ml) in 7 independent MDM donors. Statistical comparison was made by paired Student's t-test. \*\*\*p < 0.001.

|                                              | DLPFC Cohort Group |                   |               |                      |
|----------------------------------------------|--------------------|-------------------|---------------|----------------------|
| Characteristic                               | HIV -              | HIV+<br>(No HIVE) | HIV +<br>HIVE | p-value              |
| Number of Subjects                           | 66                 | 76                | 14            | -                    |
| Age at death, mean ± SD                      | 50.6 ± 16.6        | 44.4 ± 9.1        | 41.6 ± 7.1    | 0.005 <sup>a</sup>   |
| Hours postmortem, mean ± SD                  | 14.8 ± 11.2        | 13.1 ± 14.1       | 19.7 ± 20.7   | 0.243 <sup>a</sup>   |
| Sex                                          |                    |                   |               |                      |
| Male (%)                                     | 49 (74%)           | 59 (78%)          | 14 (100%)     | 0.104 <sup>b</sup>   |
| Female (%)                                   | 17 (26%)           | 17 (22%)          | 0 (0%)        |                      |
| Race                                         |                    |                   |               |                      |
| White (%)                                    | 43 (65%)           | 48 (63%)          | 12 (86%)      | 0.143 <sup>b</sup>   |
| Black (%)                                    | 16 (24%)           | 22 (29%)          | 1 (7%)        |                      |
| Other/Unknown (%)                            | 7 (10%)            | 6 (8%)            | 1 (7%)        |                      |
| Ethnicity                                    |                    |                   |               |                      |
| Hispanic (%)                                 | 19 (29%)           | 13 (17%)          | 2 (14%)       | 0.195 <sup>b</sup>   |
| Not Hispanic (%)                             | 41 (71%)           | 63 (83%)          | 12 (86%)      |                      |
| Disease Parameters                           |                    |                   |               |                      |
| Log plasma HIV c/mL, mean ± SD               | -                  | 4.3 ± 1.4         | 5.2 ± 0.9     | 0.450 <sup>c</sup>   |
| Log CSF HIV c/mL, mean ± SD                  | -                  | 3.8 ± 0.8         | 5.9 ± 1.4     | < 0.001 <sup>c</sup> |
| Log Brain HIV c/g, mean ± SD                 | -                  | 2.8 ± 1.1         | 5.3 ± 1.5     | < 0.001 <sup>c</sup> |
| CD4+ lymphocytes/mm <sup>3</sup> , mean ± SD | -                  | 116 ± 169         | 49 ± 49       | 0.158 <sup>c</sup>   |
| Neurocognitive Impairment                    |                    |                   |               |                      |
| HAND (%)                                     | -                  | 37 (49%)          | 9 (64%)       | 0.591 <sup>b</sup>   |
| Neuropsych Impairment Other Origin (%)       | -                  | 22 (29%)          | 3 (21%)       |                      |
| Neurocognitive Normal (%)                    | -                  | 6 (8%)            | 0 (0%)        |                      |
| No Neurocognitive Data (%)                   | -                  | 11 (14%)          | 2 (14%)       |                      |

**Supplemental Table 1 (part 1 of 2)**

| Characteristic       | DLPFC Cohort Group |                   |               | p-value            |
|----------------------|--------------------|-------------------|---------------|--------------------|
|                      | HIV -              | HIV+<br>(No HIVE) | HIV +<br>HIVE |                    |
| ART Treatment Status |                    |                   |               |                    |
| ART-experienced (%)  | -                  | 49 (65%)          | 8 (57%)       | 0.079 <sup>b</sup> |
| ART-naïve (%)        | -                  | 10 (13%)          | 5 (36%)       |                    |
| Unknown ART (%)      | -                  | 17 (22%)          | 1 (7%)        |                    |

**Supplemental Table 1 (part 2 of 2):** DLPFC cohort demographic, clinical, and antiretroviral therapy data. Abbreviations: HIV encephalitis (HIVE), standard deviation (SD), HIV-associated neurocognitive disorders (HAND), antiretroviral therapy (ART). Sample size within these group or subgroups are smaller than the overall sample size due the availability of data. <sup>a</sup> Analysis of Variance p-value; <sup>b</sup> Chi-square test p-value ; <sup>c</sup> Student's t-test p-value

| Regional Analysis Cohort Group                   |                |                        |                 |                      |
|--------------------------------------------------|----------------|------------------------|-----------------|----------------------|
| Characteristic                                   | HIV -          | HIV+/HAND<br>(No HIVE) | HIV +<br>HIVE   | p-value              |
| Number of Subjects                               | 12             | 12                     | 10              | -                    |
| Age at death, mean $\pm$ SD                      | 43.0 $\pm$ 4.5 | 41.9 $\pm$ 7.6         | 40.0 $\pm$ 5.7  | 0.518 <sup>a</sup>   |
| Hours postmortem, mean $\pm$ SD                  | 24.4 $\pm$ 7.2 | 22.2 $\pm$ 17.7        | 26.2 $\pm$ 24.9 | 0.869 <sup>a</sup>   |
| Sex                                              |                |                        |                 |                      |
| Male (%)                                         | 9 (75%)        | 10 (83%)               | 9 (90%)         | 0.652 <sup>b</sup>   |
| Female (%)                                       | 3 (25%)        | 2 (17%)                | 1 (10%)         |                      |
| Race                                             |                |                        |                 |                      |
| White (%)                                        | 9 (75%)        | 9 (75%)                | 8 (80%)         | 0.938 <sup>b</sup>   |
| Black (%)                                        | 2 (17%)        | 1 (8%)                 | 1 (10%)         |                      |
| Other/Unknown (%)                                | 1 (8%)         | 2 (17%)                | 1 (10%)         |                      |
| Ethnicity                                        |                |                        |                 |                      |
| Hispanic (%)                                     | 3 (25%)        | 1 (8%)                 | 1 (10%)         | 0.454 <sup>b</sup>   |
| Not Hispanic (%)                                 | 9 (75%)        | 11 (92%)               | 9 (90%)         |                      |
| Disease Parameters                               |                |                        |                 |                      |
| Log plasma HIV c/mL, mean $\pm$ SD               | -              | 4.5 $\pm$ 1.5          | 5.2 $\pm$ 0.9   | 0.213 <sup>c</sup>   |
| Log CSF HIV c/mL, mean $\pm$ SD                  | -              | 2.8 $\pm$ 1.4          | 5.5 $\pm$ 1.4   | < 0.001 <sup>c</sup> |
| CD4+ lymphocytes/mm <sup>3</sup> , mean $\pm$ SD | -              | 50 $\pm$ 106           | 46 $\pm$ 30     | 0.158 <sup>c</sup>   |
| Neurocognitive Impairment                        |                |                        |                 |                      |
| HAND (%)                                         | -              | 12 (100%)              | 6 (60%)         | 0.053 <sup>b</sup>   |
| Neuropsych Impairment Other Origin (%)           | -              | 0 (0%)                 | 3 (30%)         |                      |
| No Neurocognitive Data (%)                       | -              | 0 (0%)                 | 1 (10%)         |                      |

**Supplemental Table 2:** Regional Analysis cohort demographic, clinical, and antiretroviral therapy data. Abbreviations: HIV encephalitis (HIVE), standard deviation (SD), HIV-associated neurocognitive disorders (HAND). Sample size within these group or subgroups are smaller than the overall sample size due the availability of data. <sup>a</sup> Analysis of Variance p-value; <sup>b</sup> Chi-square test p-value ; <sup>c</sup> Student's t-test p-value

| Human Gene | Company            | Primer and Probe Set Catalog # |
|------------|--------------------|--------------------------------|
| CD163      | Applied Biosystems | Hs01016661_m1                  |
| CD68       | Applied Biosystems | Hs00154355_m1                  |
| CD8A       | Applied Biosystems | Hs01555600_m1                  |
| GAPDH      | Applied Biosystems | Hs99999905_m1                  |
| IRF1       | Applied Biosystems | Hs00971959_m1                  |
| ISG15      | Applied Biosystems | Hs00192713_m1                  |
| MX1        | Applied Biosystems | Hs00182073_m1                  |

**Supplemental Table 3:** RT-PCR primer and probe sets.

| Primary Antibody  | Host Species | Mono- or Polyclonal | Provider                | Catlog # | Dilution Used | Final Antibody Concentration | kDa of Band Quantified |
|-------------------|--------------|---------------------|-------------------------|----------|---------------|------------------------------|------------------------|
| $\beta$ -tubulin  | rabbit       | monoclonal          | Cell Signaling          | 2128     | 1:1000        | 0.014 $\mu$ g/ml             | 55 kDa                 |
| FTH1              | rabbit       | polyclonal          | Cell Signaling          | 3998     | 1:1000        | 0.071 $\mu$ g/ml             | 21 kDa                 |
| GAPDH             | mouse        | monoclonal          | Advanced Immunochemical | Mab 6C5  | 1:30000       | 0.260 $\mu$ g/ml             | 35 kDa                 |
| GPX1              | rabbit       | monoclonal          | Cell Signaling          | 3286     | 1:1000        | 0.110 $\mu$ g/ml             | 21 kDa                 |
| GSTP1             | mouse        | monoclonal          | Cell Signaling          | 3369     | 1:1000        | 0.400 $\mu$ g/ml             | 23 kDa                 |
| HO-1*             | rabbit       | polyclonal          | Enzo Life Sciences      | SPA-895  | 1:500 - 1:250 | 2.0 - 4.0 $\mu$ g/ml         | 29 kDa                 |
| HO-1 <sup>#</sup> | rabbit       | polyclonal          | Enzo Life Sciences      | SPA-896  | 1:500 - 1:250 | 2.0 - 4.0 $\mu$ g/ml         | 29 kDa                 |
| HO-2              | rabbit       | polyclonal          | Enzo Life Sciences      | SPA-897  | 1:500 - 1:250 | 2.0 - 4.0 $\mu$ g/ml         | 35 kDa                 |
| NQO1              | mouse        | monoclonal          | Abcam                   | ab28947  | 1:1000        | 1.0 $\mu$ g/ml               | 28 kDa                 |
| PRDX1             | rabbit       | polyclonal          | Cell Signaling          | 8732     | 1:1000        | 0.096 $\mu$ g/ml             | 21 kDa                 |
| SOD1              | mouse        | monoclonal          | Cell Signaling          | 4266     | 1:1000        | 0.250 $\mu$ g/ml             | 18 kDa                 |
| TRXR1             | rabbit       | polyclonal          | Cell Signaling          | 6925     | 1:1000        | 0.025 $\mu$ g/ml             | 55 kDa                 |

**Supplemental Table 4:** Primary antibodies for Western blotting. \*Antibody used for Western blot detection of HO-1 in human brain tissue. <sup>#</sup>Antibody used for Western blot detection of HO-1 in all in vitro studies using primary cells.

| Secondary Antibody                                   | Host Species | Provider               | Catlog #    | Dilution Used | Final Antibody Concentration |
|------------------------------------------------------|--------------|------------------------|-------------|---------------|------------------------------|
| IRDye 680RD Goat Anti-Mouse IgG                      | goat         | Licor                  | 926-68070   | 1:20000       | 0.050 µg/ml                  |
| IRDye 680RD Goat Anti-Rabbit IgG                     | goat         | Licor                  | 926-68071   | 1:20000       | 0.050 µg/ml                  |
| IRDye 800CW Goat Anti-Mouse IgG                      | goat         | Licor                  | 926-32210   | 1:15000       | 0.067 µg/ml                  |
| IRDye 800CW Goat Anti-Rabbit IgG                     | goat         | Licor                  | 926-32211   | 1:15000       | 0.067 µg/ml                  |
| HRP-conjugated AffiniPure Goat Anti-Mouse IgG (H+L)  | goat         | Jackson ImmunoResearch | 115-035-003 | 1:5000        | 0.160 µg/ml                  |
| HRP-conjugated AffiniPure Goat Anti-Rabbit IgG (H+L) | goat         | Jackson ImmunoResearch | 111-035-003 | 1:5000        | 0.160 µg/ml                  |
| HRP-conjugated Goat Anti-Rabbit IgG (H+L)            | goat         | Cell Signaling         | 7074        | 1:1000        | 0.071 µg/ml                  |
| HRP-conjugated Horse Anti-Mouse IgG (H+L)            | horse        | Cell Signaling         | 7076        | 1:1000        | 0.111 µg/ml                  |

**Supplemental Table 5:** Secondary antibodies for Western blotting. Signal intensity was analyzed using ImageJ for HRP-conjugated secondary antibodies and Image Studio (LiCor) for fluorescent secondary antibodies.

| Human Gene mRNA Targeted       | Company                       | Product Line     | siRNA ID Number        |
|--------------------------------|-------------------------------|------------------|------------------------|
| BACH1                          | Ambion<br>(Life Technologies) | Silencer® Select | s1859*                 |
| BACH1                          | Ambion<br>(Life Technologies) | Silencer® Select | s1860                  |
| HO-1                           | Ambion<br>(Life Technologies) | Silencer® Select | s6673*                 |
| HO-1                           | Ambion<br>(Life Technologies) | Silencer® Select | s6674                  |
| HO-2                           | Ambion<br>(Life Technologies) | Silencer® Select | s6675*                 |
| HO-2                           | Ambion<br>(Life Technologies) | Silencer® Select | s6677                  |
| Scramble<br>(Negative Control) | Ambion<br>(Life Technologies) | Silencer® Select | Catalog #:<br>4390846* |

**Supplemental Table 6:** Small interfering RNAs (siRNAs) used for knockdown experiments. \* siRNA used in HIV-MDM experiments'

## Supplemental Methods

### *Subjects in DLPFC cohort*

A cohort of 90 HIV-positive (HIV<sup>+</sup>) and 66 HIV-negative (HIV<sup>-</sup>) subjects was selected from the NNTC (1) autopsy cohort for analysis of protein expression within DLPFC tissue. This cohort was assembled by the Texas NeuroAIDS Research Center and has been described in a prior report (2). The 90 HIV<sup>+</sup> cases included subjects who had pathologically confirmed encephalitis (HIVE<sup>+</sup>; n=14) and subjects who did not have HIVE (HIV<sup>+</sup>/HIVE<sup>-</sup>; n=76). Among the 76 HIV<sup>+</sup>/HIVE<sup>-</sup> individuals were 37 confirmed cases of HAND, 6 cases confirmed as neurocognitively normal, and 33 cases with either no associated neurocognitive diagnosis or neurocognitive dysfunction in which factors other than HIV infection were not ruled out. Among the 14 HIVE<sup>+</sup> cases, 9 were confirmed to have HAND (the other 5 had either no associated neurocognitive diagnosis or neurocognitive dysfunction in which factors other than HIV infection were not ruled out). Following administration of the neurocognitive test battery implemented by the NNTC (3), the neurocognitive diagnosis of HAND was assigned by the supervising neuropsychologist according to the Frascati Criteria (4) as reviewed by an experienced neurologist. NNTC site neuropathologists rendered nosological diagnoses of HIVE as guided by the criteria of Budka et al (5). Sixty-three percent of HIV<sup>+</sup> subjects were ART-experienced. HIV<sup>-</sup> subjects were significantly older than HIV<sup>+</sup> subjects on average by 6.6 years, but did not significantly differ from HIV<sup>+</sup> subjects in gender, ethnicity, race, or post-mortem interval. See Supplemental Table 1 for summarized demographic and clinical data. Further details on the demographic and clinical data of this cohort were described previously (2).

### *Subjects in regional analysis cohort*

A cohort of 12 HIV-negative (HIV<sup>-</sup>), 12 HIV-positive with a diagnosis of HAND (HIV<sup>+</sup>/HAND), and 10 HIV-positive with HIVE (HIVE<sup>+</sup>) subjects was selected from the

NNTC (1) for a regional brain analysis of protein expression within the striatum (head of caudate), occipital cortex, and cerebellum (anterior cerebellar cortex). This cohort was matched for age, post mortem interval, sex, race, and ethnicity (Supplemental Table 2). Of the 34 cases in this regional analysis cohort, 16 were represented in the larger DLPFC cohort.

#### *Brain dissection and extraction of protein and RNA*

DLPFC was dissected from Brodmann areas 9 or 10. For protein extraction, fresh-frozen brain (30-500 mg) was homogenized by silica bead beating, sonicated, and solubilized (0.03% TX-100, 0.5 mM DTT, 5 mM MgCl<sub>2</sub>, Tris 10 mM, pH 7.8). RNA was prepared using the RNeasy Lipid Tissue Mini Kit (Qiagen) as previously described (2, 6). Briefly, 100 mg of brain tissue from an adjacent region of protein extraction was dissected on dry ice and homogenized in a minibead beater. RNA was extracted with chloroform and centrifuged in RNeasy mini spin columns, washed, and eluted.

#### *Quantification of viral loads and CD4 count*

In the majority of cases, blood and CSF samples were obtained within 6 months of subject death and on the same day that neurocognitive domains were assessed. Plasma and CSF viral loads were determined with the Amplicor HIV-1 Monitor test v1.1 through v1.5 (*Roche*). Brain parenchyma HIV RNA was quantified from brain extracted RNA as previously described (2, 6). Briefly, 1 µg microgram of brain RNA and 1 µM of antisense primer 84R were used in 20 µl reaction (iScript cDNA Synthesis Kit, Bio-Rad Laboratories). Four microliters of cDNA was used for 25 µl real-time PCR by using JumpStart Taq ReadyMix for Quantitative PCR (Sigma) and SmartCycler (Cepheid). Results were standardized against a known brain secondary standard. CD4+ T-lymphocyte counts were determined by flow cytometry and performed at each NNTC site's Clinical Laboratory Improvement Amendments (CLIA)–certified, or CLIA equivalent, medical center laboratory.

### *Quantification of brain mRNAs*

Expression of brain mRNAs was quantified after cDNA synthesis from mRNA samples using Taq-Man Universal PCR Master Mix (Applied Biosystems) by RT-PCR as previously described (6). Duplicate RT-PCR reactions were run and relative mRNA expression was calculated using the  $\Delta\Delta C_t$  method (compared to GAPDH mRNA expression) using the primer and probe mixes listed in Supplemental Table 3.

### *Western blot analysis*

Cell cultures were rinsed with ice-cold PBS, lysed in 75mM Tris-HCL (pH 6.8) containing 15% glycerol, 3.75mM EDTA, and 3% SDS, and supplemented with Complete Protease Inhibitor Cocktail (Roche) and PhosSTOP phosphatase inhibitor mixture (Roche). Cell and DLPFC protein lysates were subjected to SDS-PAGE as previously described (7) using primary and secondary antibodies listed in Supplemental Tables 4 and 5. For all autopsy cases, protein expression as determined by Western blotting was normalized to both  $\beta$ -tubulin and GAPDH expression (supplemental figures).

### *Isolation and culture of human monocyte-derived macrophages (MDM)*

Human monocytes were isolated from healthy donors by Ficoll density gradient centrifugation as previously described (8). Monocytes were plated at  $10.5 \times 10^3$  cells/cm<sup>2</sup> in Cell-Bind plates (Corning) and cultured in DMEM supplemented with 10% FBS (Thermo Scientific), 10% horse serum (Invitrogen), 1% nonessential amino acids (Invitrogen), 2mM glutamine (Invitrogen), and 50U/ml penicillin/streptomycin at 37°C, 6% CO<sub>2</sub>. Cells were cultured for 7 days in vitro (DIV) and visually inspected for MDM differentiation before use in HIV-infection experiments. MDM were cultured for 7-10 DIV before use in noninfectious experiments.

### *HIV infection of MDM*

Differentiated MDM were exposed to 50-100ng of p24 of HIV-1 89.6 (R5/X4 strain) or Jago (R5 strain) per  $10^6$  cells for 24 hours. HIV-Jago is a macrophage-tropic CSF isolate from a patient with confirmed HIV-associated dementia (9). Virus stocks were prepared by the University of Pennsylvania Center for AIDS Research Virology Core. Supernatants from HIV-infected or noninfected (mock) MDM were collected every 3 days and stored at  $-80^{\circ}\text{C}$ . Supernatants were monitored for HIV replication by quantifying viral reverse transcriptase (RT) activity, as analyzed by the amount of radiolabeled deoxythymidine incorporation (10). Briefly, 10 $\mu\text{l}$  of MDM supernatant is incubated with 50 $\mu\text{l}$  of RT cocktail (50 $\mu\text{M}$  Tris pH 7.8, 75 $\mu\text{M}$  KCl, 5 $\mu\text{M}$   $\text{MgCl}_2$ , 0.05% NP-40, 2 $\mu\text{M}$  DTT, 5 $\mu\text{g/ml}$ , 1.6 mU *poly(rA)·p(dT)<sub>12-18</sub>*, and 10 $\mu\text{Ci/ml}$  dTTP [ $\alpha$ - $^{32}\text{P}$ ]) at  $37^{\circ}\text{C}$  overnight. 30 $\mu\text{l}$  of sample is dotted onto DE81 Whatman ion exchange cellular chromatography paper (Fisher) and air dried for 30 minutes, washed four times with 2X UltraPure SCC (Invitrogen), washed once in absolute ethanol, and dried at  $80$ - $100^{\circ}\text{C}$  for 30 minutes. Whatman paper is then placed in scintillation vial with 5ml of Scintiverse BD cocktail (Fisher) and counted for  $^{32}\text{P}$  in a scintillation counter.

### *MDM-mediated neurotoxicity*

Rat cerebrocortical mixed neuroglial cultures (~70% neurons, 30% glia) were prepared from E17 embryos of Sprague-Dawley rats, as previously described (7). Cells were plated in tissue-culture plates pre-coated with poly-L-lysine (Peptides International) and maintained in neurobasal media plus B27 supplement (Invitrogen) at  $37^{\circ}\text{C}$  and 5%  $\text{CO}_2$ . After 7 DIV, approximately one-half volume of fresh media was added to the cells to replace evaporation losses. All cultures were used between days 14 and 17 DIV. Cell-based MAP2 ELISAs were performed on primary rat cerebrocortical cells plated at a density of  $1 \times 10^4$  cells/well in 96-well plates as previously described (7, 8). Following a 24 hour exposure to HIV-MDM supernatant ( $n = 6$  technical replicates), neuronal cultures were fixed and fluorescently labeled using the following reagents: mouse anti-

MAP2 (Covance), goat anti-mouse  $\beta$ -lactamase TEM-1 conjugate (Invitrogen), and Fluorocillin Green substrate (Invitrogen). Fluorescence intensity was measured using a fluorimetric plate reader with a 480/520-nm filter set. MDM supernatant was applied at 1:10-1:60 dilution; the dilution that gave values within the linear range of the assay is presented. For uninfected MDM experiments pure neuronal cultures (~97-99% neurons,  $5 \times 10^4$  cells/well) were used in order to detect lower levels of neurotoxicity. To obtain pure neuronal cultures cells were treated with 10  $\mu$ M arabinosylcytosine 48 hours after plating and otherwise handled as described above. Neuronal survival was expressed as a percentage of untreated (UT) cultures. In previous publications we have demonstrated that this MAP-2 ELISA quantification robustly correlates with neuronal death as determined by hand counts of surviving MAP-2 stained neurons in this culture system (11, 12).

#### *MDM extracellular glutamate*

Glutamate concentration in MDM supernatant was assayed in triplicate using the Amplex Red Glutamic Acid/Glutamate Oxidase Assay Kit (Invitrogen) according to the manufacturer's directions.

#### *MDM cytotoxicity*

Freshly isolated human monocytes were plated at a density of  $3.4 \times 10^4$  cells/well in Cell-bind 96-well plates. On day 12 of HIV-infection or day 6 of drug treatment, MDM cell cytotoxicity was assayed using the CytoTox-Glo Cytotoxicity Assay (Promega) according to the manufacturer's directions.

#### *siRNA knockdown*

Silencer® Select siRNAs (Ambion; Supplemental Table 6) were transfected at a final concentration of 50nM using Lipofectamine RNAiMax (Invitrogen). Lipofectamine and

siRNA were pre-incubated for 10 minutes in 50µl of Opti-Mem (Invitrogen) prior to treatment of MDM. All knockdown experiments were verified by Western blot. Transfection efficiency was evaluated using the BLOCK-IT™ Alexa Fluor® Red Fluorescent Oligo (Invitrogen).

#### *Human Fetal Astrocytes (HFA)*

HFA cultures were prepared from fetal brain tissue (gestational age 16-18 weeks) obtained from elective abortion procedures. Tissues were digested with 0.25% trypsin and 10U/mL DNASE I and further dissociated to obtain single-cell suspensions. Cells were maintained under 10% CO<sub>2</sub> for 5 days in mixed glial growth media (DMEM:F12, 10% FBS, 50µg/ml gentamicin, 2µM L-glutamine, 10µg/ml insulin, and 5µg/ml fungizone). Monolayers that remained after shaking cells for 14-18 hours at 200rpm constituted astrocytes (confirmed by *glial fibrillary acidic protein (GFAP)* and glutamate aspartate transporter 1 (GLAST-1) staining) and were fed with astrocyte growth media (DMEM:F12, 15% FBS, 50µg/ml gentamicin, 2µM L-glutamine, 10µg/ml insulin, and 5µg/ml fungizone) and plated to 6 or 12 well plates for experiments. For 24 hour experiments, cells were treated on DIV6 and collected on DIV7. For 15 day experiments, treatment began on DIV2, media and treatment was replaced every 3 days, and cells were collected on DIV17.

#### *Drugs and chemical preparations*

Stock solutions of DMF, MMF, tBHQ, and camptothecin (Sigma-Aldrich) were prepared in DMSO and stored at -20°C until use. CoPP and SnMP (Frontier Scientific) were prepared in 1N NaOH and stored at -20°C until use. Stock solutions of mercaptosuccinic acid and dicoumarol (Sigma-Aldrich) and IFN $\gamma$ , TNF $\alpha$ , and LPS (Peprotech) were prepared in PBS and stored at -20°C until use. Stock solutions of efavirenz (NIH AIDS Research and Reference Reagent Program) were prepared in DMSO and frozen at -80°C until use.

### *Experimental Blinding*

All studies of protein and RNA brain expression were performed with coded samples by a blinded investigator. For all cell culture studies, the investigator performed treatments, cell harvesting, and Western blotting according to standard protocols without blinding. Quantification of neurotoxicity by MAP-2 ELISA and quantification of HIV replication by reverse transcriptase assay were performed by investigators blinded to treatment conditions.

## Supplemental References

1. Morgello S, Gelman BB, Kozlowski PB, Vinters HV, Masliah E, Cornford M, Cavert W, Marra C, Grant I, and Singer EJ. The National NeuroAIDS Tissue Consortium: a new paradigm in brain banking with an emphasis on infectious disease. *Neuropathol Appl Neurobiol*. 2001;27(4):326-35.
2. Nguyen TP, Soukup VM, and Gelman BB. Persistent hijacking of brain proteasomes in HIV-associated dementia. *The American journal of pathology*. 2010;176(2):893-902.
3. Woods SP, Rippeth JD, Frol AB, Levy JK, Ryan E, Soukup VM, Hinkin CH, Lazzaretto D, Cherner M, Marcotte TD, et al. Interrater reliability of clinical ratings and neurocognitive diagnoses in HIV. *J Clin Exp Neuropsychol*. 2004;26(6):759-78.
4. Antinori A, Arendt G, Becker JT, Brew BJ, Byrd DA, Cherner M, Clifford DB, Cinque P, Epstein LG, Goodkin K, et al. Updated research nosology for HIV-associated neurocognitive disorders. *Neurology*. 2007;69(18):1789-99.
5. Budka H, Wiley CA, Kleihues P, Artigas J, Asbury AK, Cho ES, Cornblath DR, Dal Canto MC, DeGirolami U, Dickson D, et al. HIV-associated disease of the nervous system: review of nomenclature and proposal for neuropathology-based terminology. *Brain Pathol*. 1991;1(3):143-52.
6. Gelman BB, Lisinicchia JG, Morgello S, Masliah E, Commins D, Achim CL, Fox HS, Kolson DL, Grant I, Singer E, et al. Neurovirological correlation with HIV-associated neurocognitive disorders and encephalitis in a HAART-era cohort. *J Acquir Immune Defic Syndr*. 2013;62(5):487-95.
7. O'Donnell LA, Agrawal A, Jordan-Sciutto KL, Dichter MA, Lynch DR, and Kolson DL. Human immunodeficiency virus (HIV)-induced neurotoxicity: roles for the NMDA receptor subtypes. *J Neurosci*. 2006;26(3):981-90.
8. Cross SA, Cook DR, Chi AW, Vance PJ, Kolson LL, Wong BJ, Jordan-Sciutto KL, and Kolson DL. Dimethyl fumarate, an immune modulator and inducer of the antioxidant response, suppresses HIV replication and macrophage-mediated neurotoxicity: a novel candidate for HIV neuroprotection. *J Immunol*. 2011;187(10):5015-25.
9. Chen W, Sulcove J, Frank I, Jaffer S, Ozdener H, and Kolson DL. Development of a human neuronal cell model for human immunodeficiency virus (HIV)-infected macrophage-induced neurotoxicity: apoptosis induced by HIV type 1 primary isolates and evidence for involvement of the Bcl-2/Bcl-xL-sensitive intrinsic apoptosis pathway. *J Virol*. 2002;76(18):9407-19.
10. Hoffman AD, Banapour B, and Levy JA. Characterization of the AIDS-associated retrovirus reverse transcriptase and optimal conditions for its detection in virions. *Virology*. 1985;147(2):326-35.
11. Wang Y, White MG, Akay C, Chodroff RA, Robinson J, Lindl KA, Dichter MA, Qian Y, Mao Z, Kolson DL, et al. Activation of cyclin-dependent kinase 5 by calpains contributes to human immunodeficiency virus-induced neurotoxicity. *Journal of neurochemistry*. 2007;103(2):439-55.
12. White MG, Wang Y, Akay C, Lindl KA, Kolson DL, and Jordan-Sciutto KL. Parallel high throughput neuronal toxicity assays demonstrate uncoupling between loss of mitochondrial membrane potential and neuronal damage in a model of HIV-induced neurodegeneration. *Neurosci Res*. 2011;70(2):220-9.
